# Supplementary material for: Supramolecular Gels Based on C3-Symmetric Amides: Application in Anion-Sensing and Removal of Dyes from Water
Source: MDPI journal article supplement (doi:10.3390/molecules29092149), 2024-05-05
Supplement: s1 [file s1]

# **SUPPORTING INFORMATION**

## **Supramolecular Gels Based on C<sub>3</sub>-Symmetric Amides: Application in Anion-Sensing and Removal of Dyes from Water**

Geethanjali Kuppadakkath, Sreejith Sudhakaran Jayabhavan, and Krishna K. Damodaran\*

### **Contents**

|                                      |    |
|--------------------------------------|----|
| 1. Gelation studies.....             | 2  |
| 2. Rheology .....                    | 3  |
| 3. Scanning electron microscopy..... | 5  |
| 4. Powder X-ray diffraction.....     | 6  |
| 5. Anion sensing.....                | 7  |
| 6. Dye Adsorption studies.....       | 9  |
| 7. NMR spectra .....                 | 14 |

## 1. Gelation studies

**Table S1.** Gelation Experiments

| Solvent               | Gelation test at 1.0 wt/v% |
|-----------------------|----------------------------|
| DMF/water (1:1, v/v)  | G <sup>**</sup>            |
| DMSO/water (1:1, v/v) | G <sup>§</sup>             |
| DMA/water (1:1, v/v)  | G <sup>**</sup>            |
| DEF/water (1:1, v/v)  | G <sup>**</sup>            |
| DEA/water (1:1, v/v)  | G <sup>**</sup>            |
| <i>p</i> -xylene      | I                          |
| <i>o</i> -xylene      | I                          |
| <i>m</i> -xylene      | I                          |
| mesitylene            | I                          |
| toluene               | I                          |
| ethanol               | G <sup>*</sup>             |
| methanol              | G <sup>*</sup>             |
| isopropanol           | G <sup>*</sup>             |
| <i>n</i> -butanol     | G <sup>*</sup>             |
| acetonitrile          | I                          |
| ethyl acetate         | I                          |
| dichloromethane       | I                          |
| chloroform            | I                          |
| hexane                | I                          |
| acetone               | I                          |

G = gel, I = insoluble, G<sup>\*</sup> = 2.0 wt/v%, G<sup>\*\*</sup> = 3.0 wt/v%, G<sup>§</sup> = 4.0 wt/v%.

## 2. Rheology

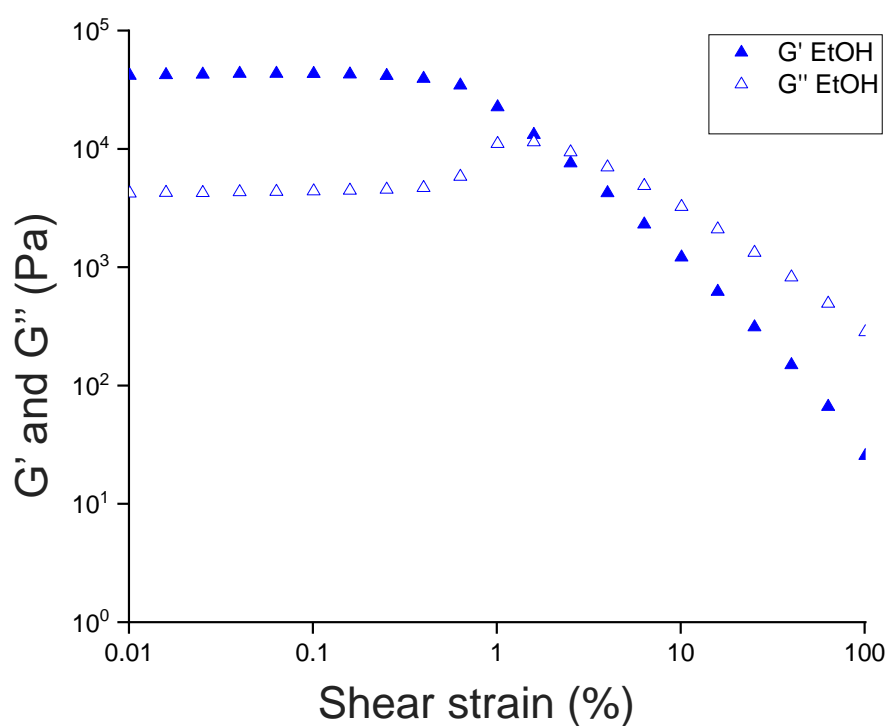

**Figure S1.** Amplitude sweep measurement was performed for the N-BTA gel in EtOH at 4.0 wt/v%.

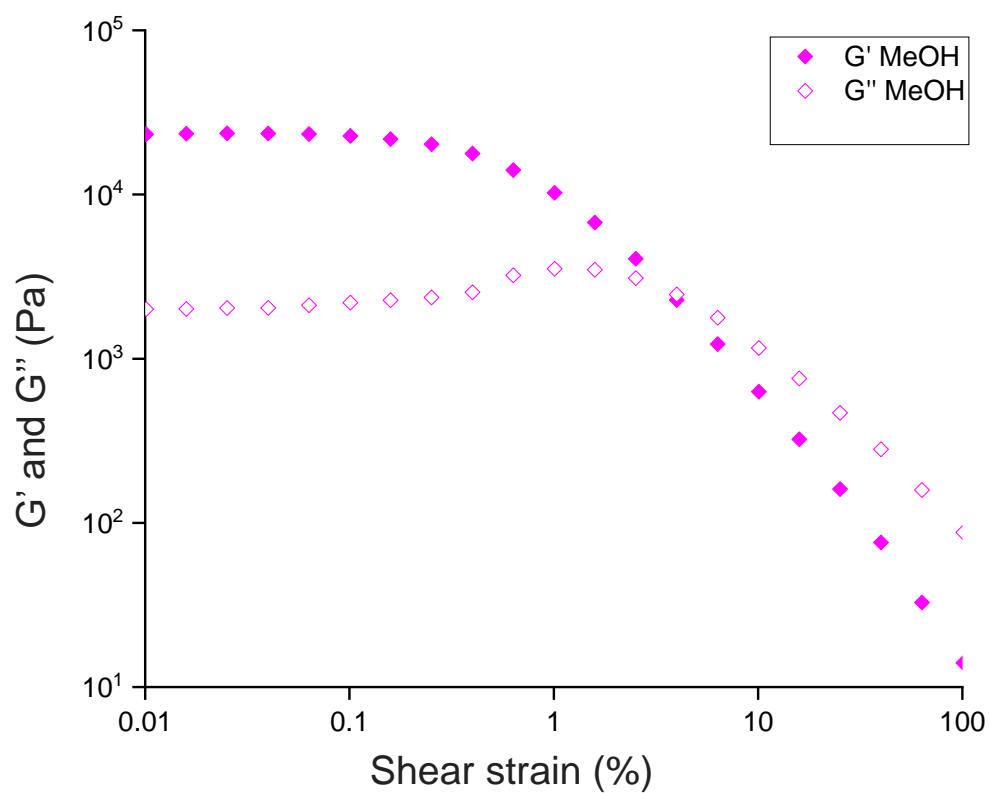

**Figure S2.** Amplitude sweep measurement was performed for the N-BTA gel in MeOH at 4.0 wt/v%.

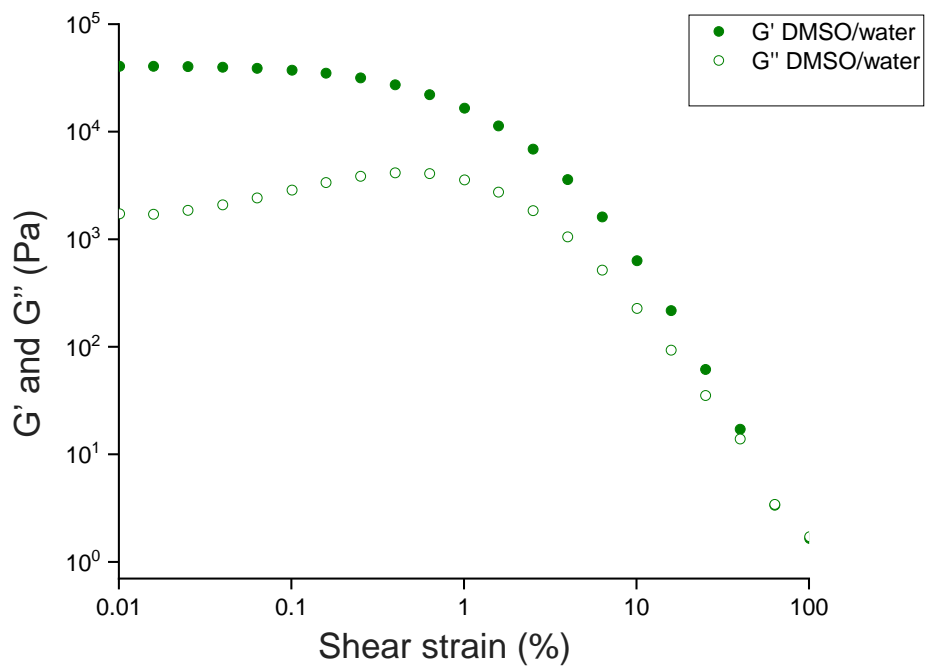

**Figure S3.** Amplitude sweep measurement was performed for the N-BTA gel in DMSO/water at 4.0 wt/v%.

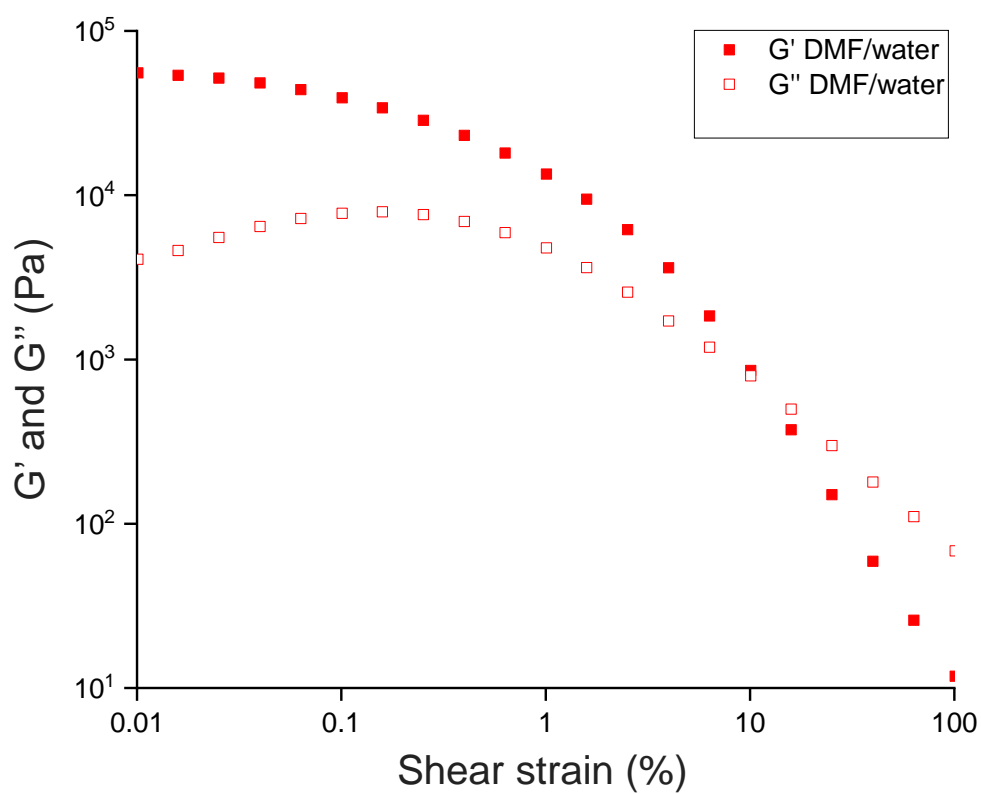

**Figure S4.** Amplitude sweep measurement was performed for the N-BTA gel in DMF/water at 4.0 wt/v%.

### 3. Scanning Electron Microscopy (SEM)

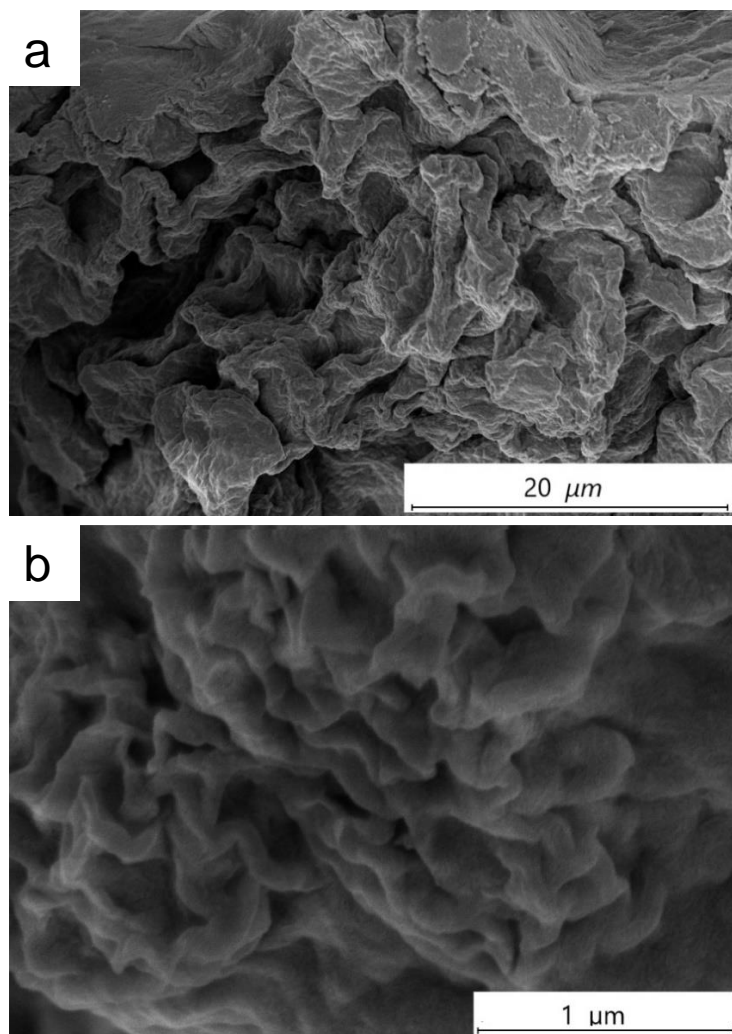

**Figure S5.** SEM images of N-BTA xerogels (2.0 wt/v%) in (a) isopropanol and (b) *n*-butanol.

#### 4. Powder X-ray diffraction

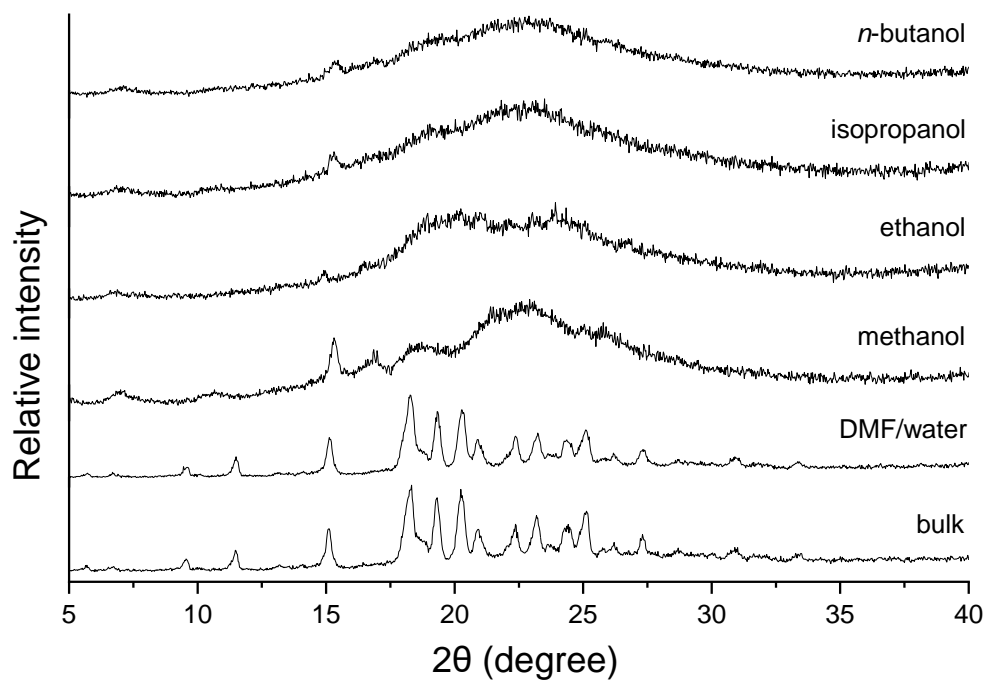

**Figure S6.** Comparison of PXRD patterns of the dried gels (4.0 wt/v%) from alcohols, DMF/water, and bulk material.

## 5. Anion sensing

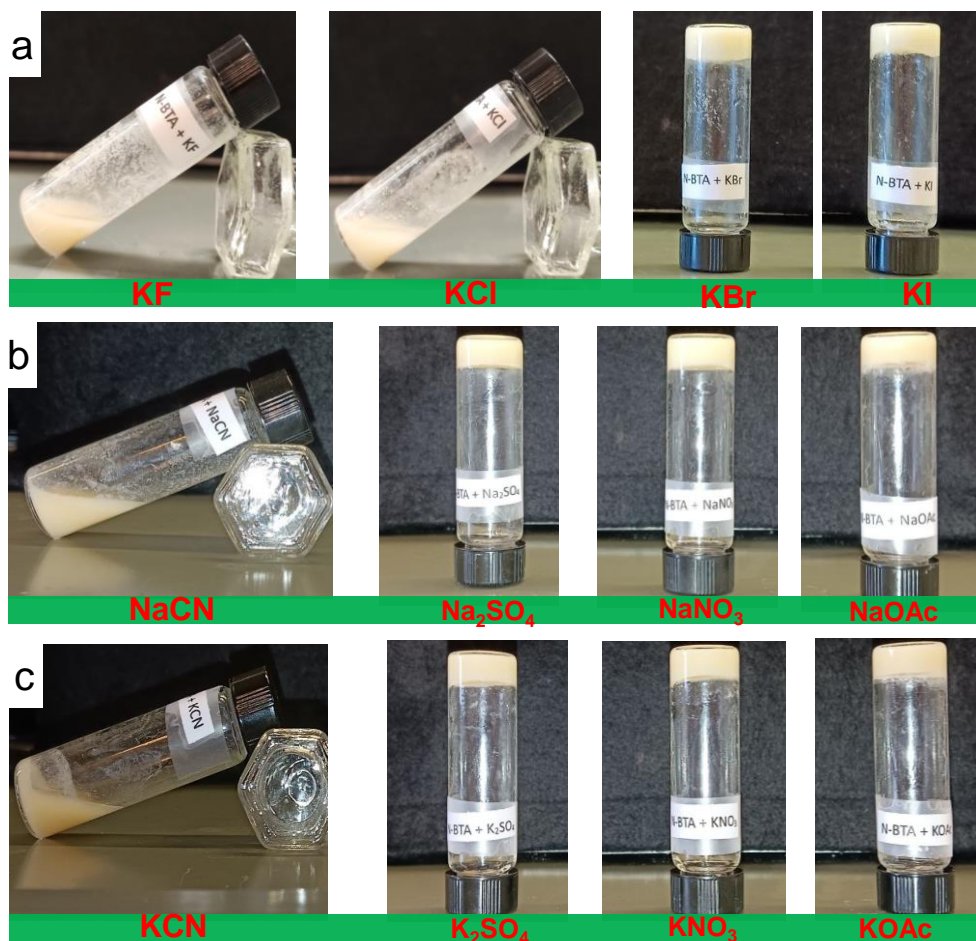

**Figure S7.** Stimuli-responsive properties of the N-BTA gels with various anions (1.0 eq) at MGC in DMSO/water (1:1, v/v); (a) potassium halides, (b) sodium and (c) potassium salts of cyanide, sulphate, nitrate and acetate anions, respectively.

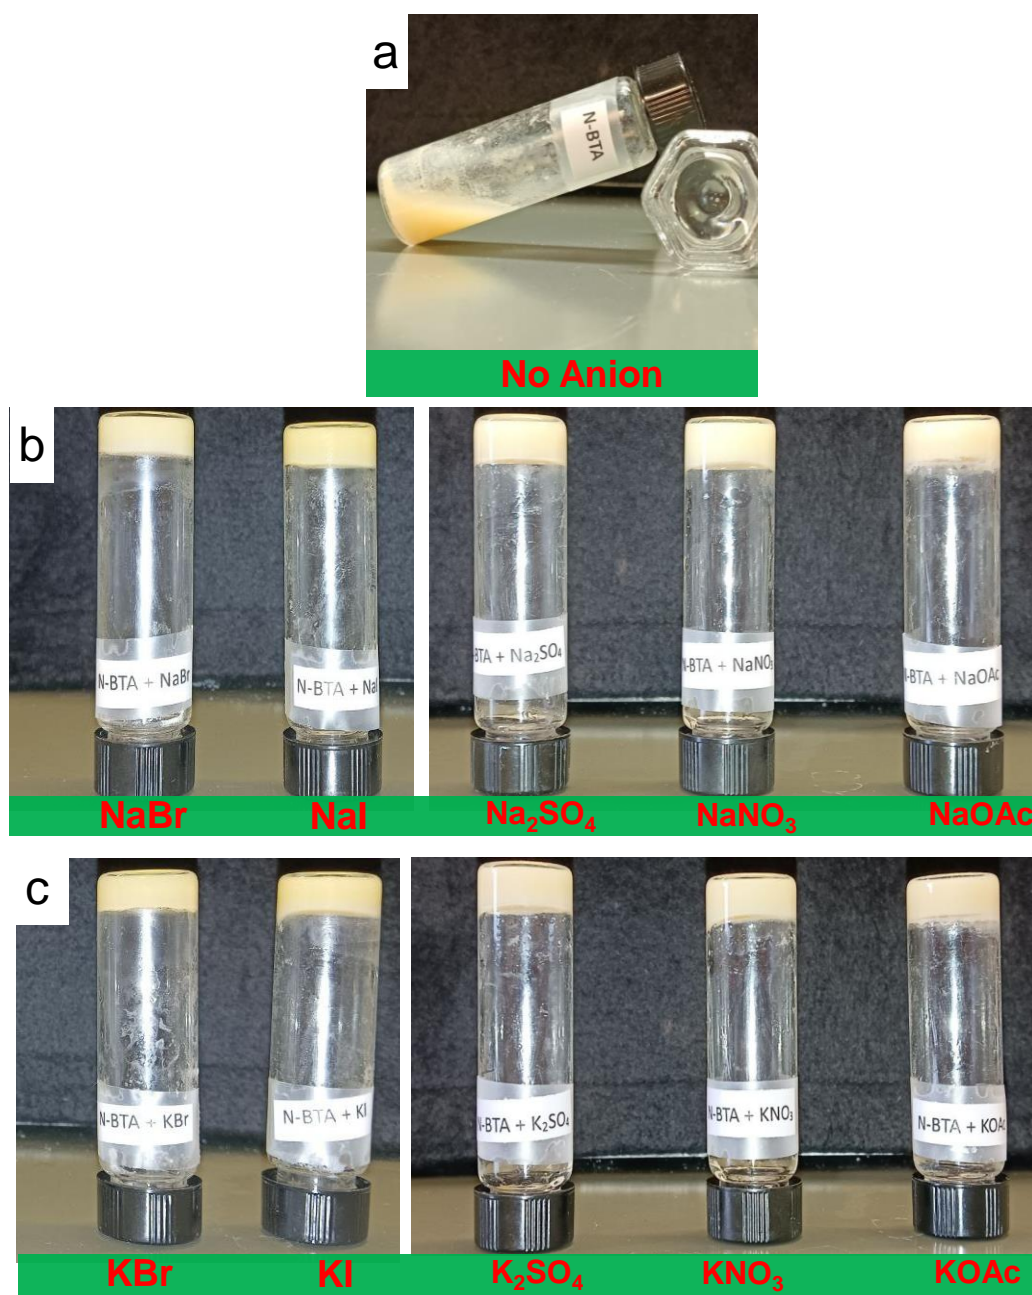

**Figure S8.** (a) N-BTA gels below MGC in DMSO/water (1:1, v/v) and anion induced gelation with (b) sodium and (c) potassium salts such as bromide, iodide, nitrate, sulphate and acetate ions (1.0 eq.).



**Table S2:**  $T_{gel}$  studies with the gels in DMSO/water (1:1, v/v) in the presence of potassium and sodium salts (1.0 equiv.).

| Anion                           | $T_{gel}$ (°C)         |                     |
|---------------------------------|------------------------|---------------------|
|                                 | Without anion (at MGC) | With anion (at MGC) |
| KI                              | 98.5                   | 99.6                |
| KBr                             | 98.5                   | 100.3               |
| NaI                             | 98.5                   | 101.6               |
| NaBr                            | 98.5                   | 100.4               |
| K <sub>2</sub> SO <sub>4</sub>  | 98.5                   | 98.6                |
| KNO <sub>3</sub>                | 98.5                   | 99.4                |
| CH <sub>3</sub> COOK            | 98.5                   | 103.6               |
| CH <sub>3</sub> COONa           | 98.5                   | 104.5               |
| Na <sub>2</sub> SO <sub>4</sub> | 98.5                   | 100.2               |
| NaNO <sub>3</sub>               | 98.5                   | 102.2               |

## 6. Dye Adsorption studies

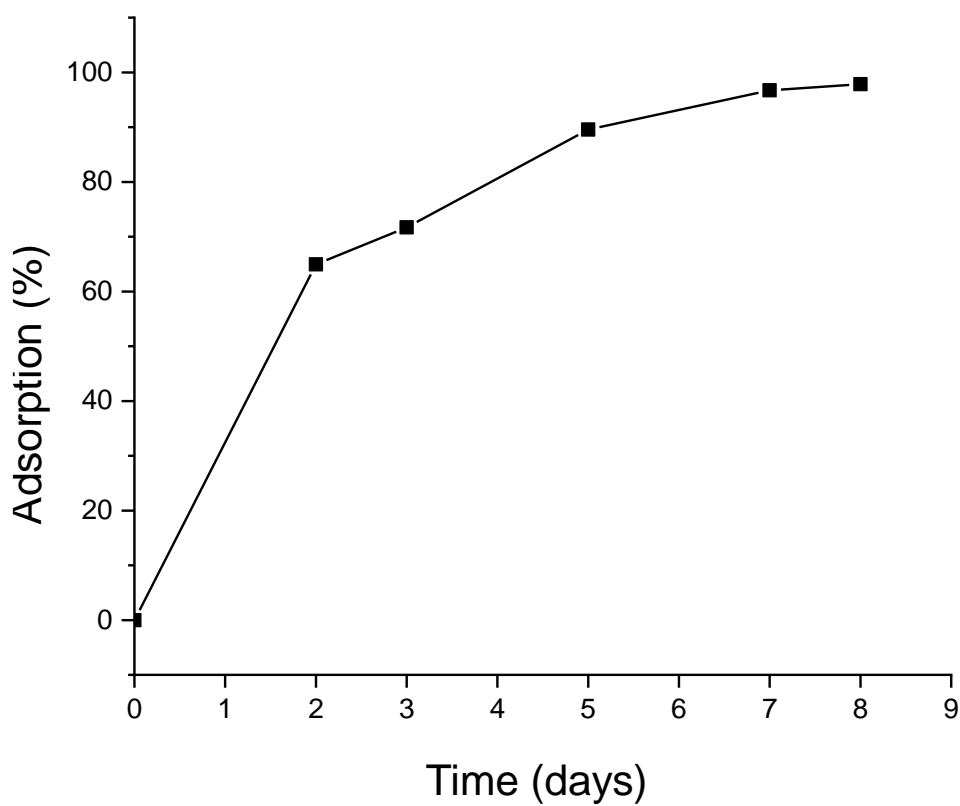

**Figure S9.** The time-dependent adsorption of MB by N-BTA gel.

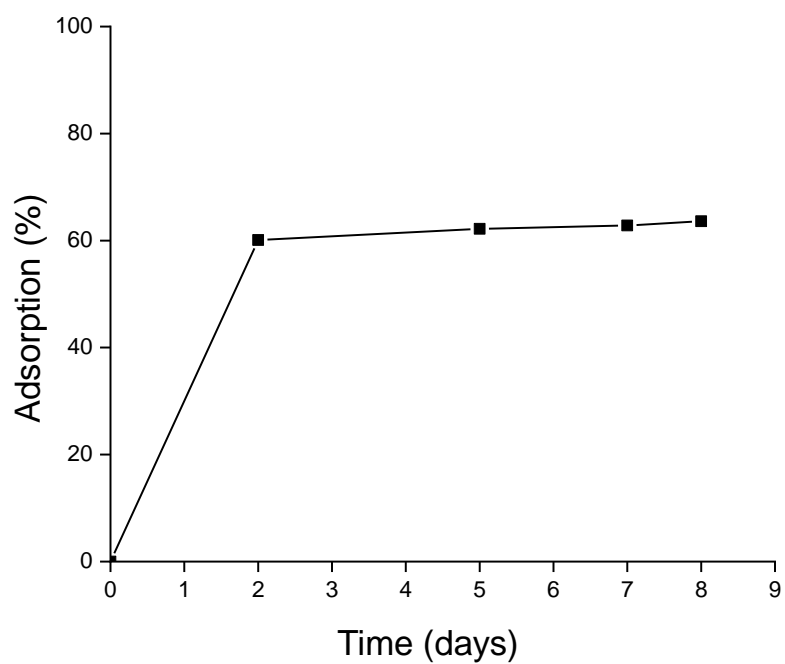

**Figure S10.** The time-dependent adsorption of MO by N-BTA gel.

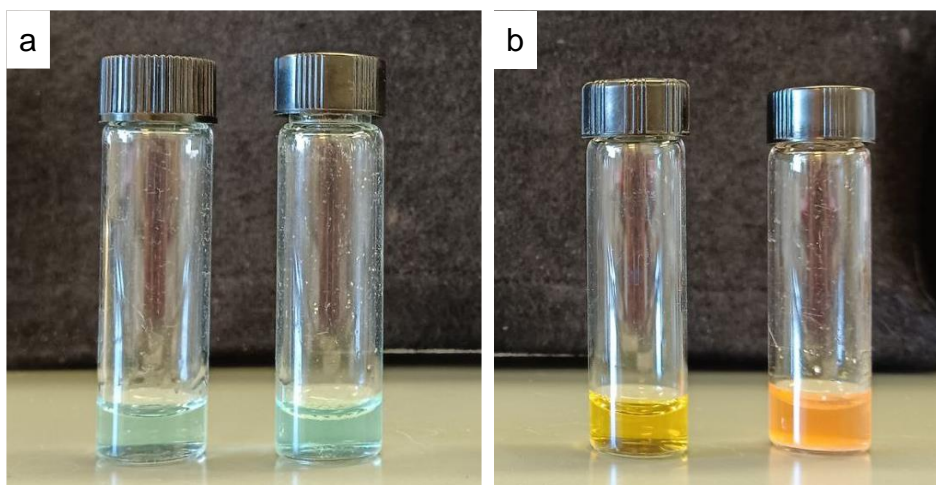

**Figure S11.** Aqueous solution of (a) MB and MO before and after the addition of dry N-BTA.

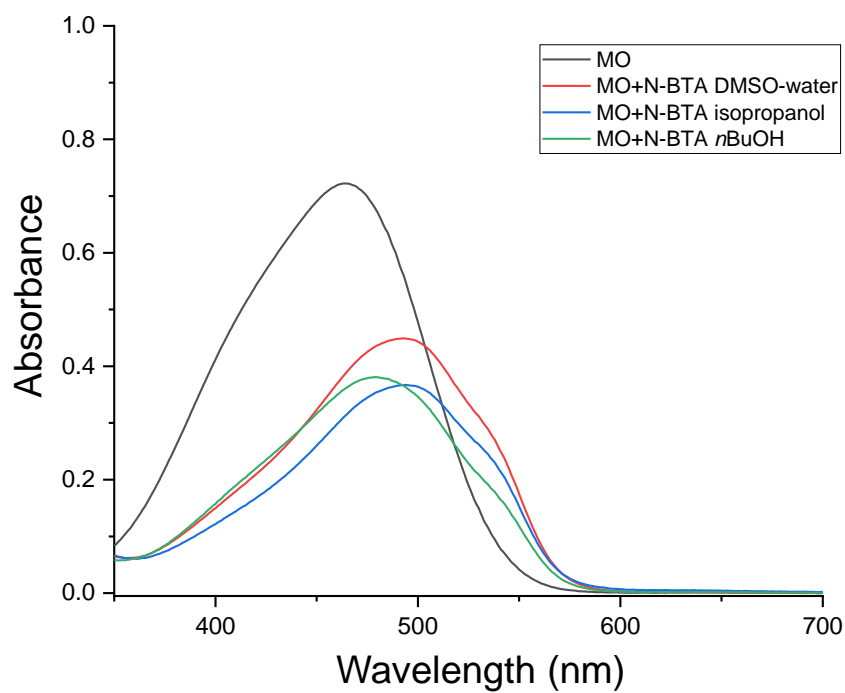

**Figure S12.** UV-vis experiments of MO ( $5.0 \times 10^{-5}$  M) with N-BTA gel from n-butanol, isopropanol, and DMSO/water.

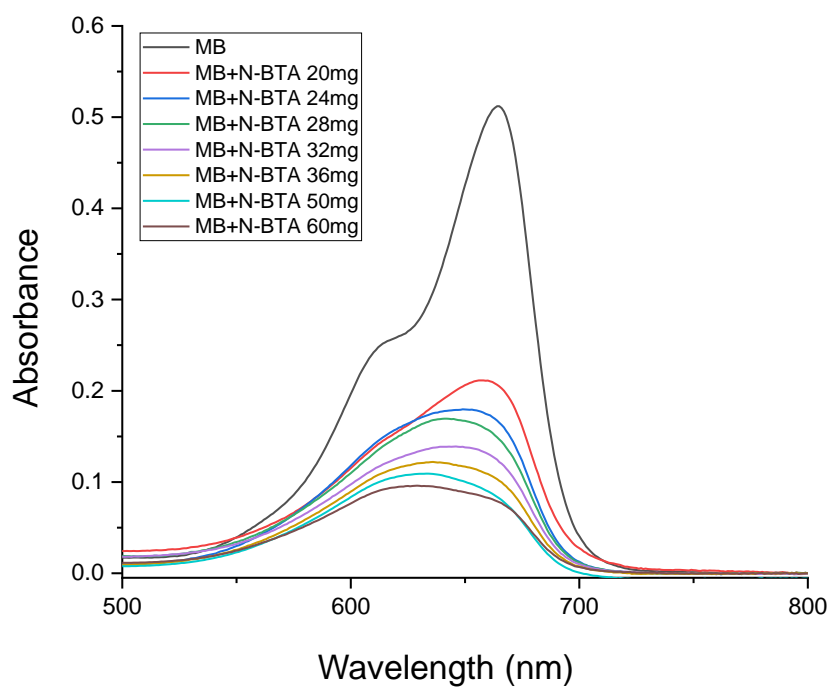

**Figure S13.** UV-vis experiments of MB ( $7.5 \times 10^{-6}$  M) with different concentrations of N-BTA after 2 days.

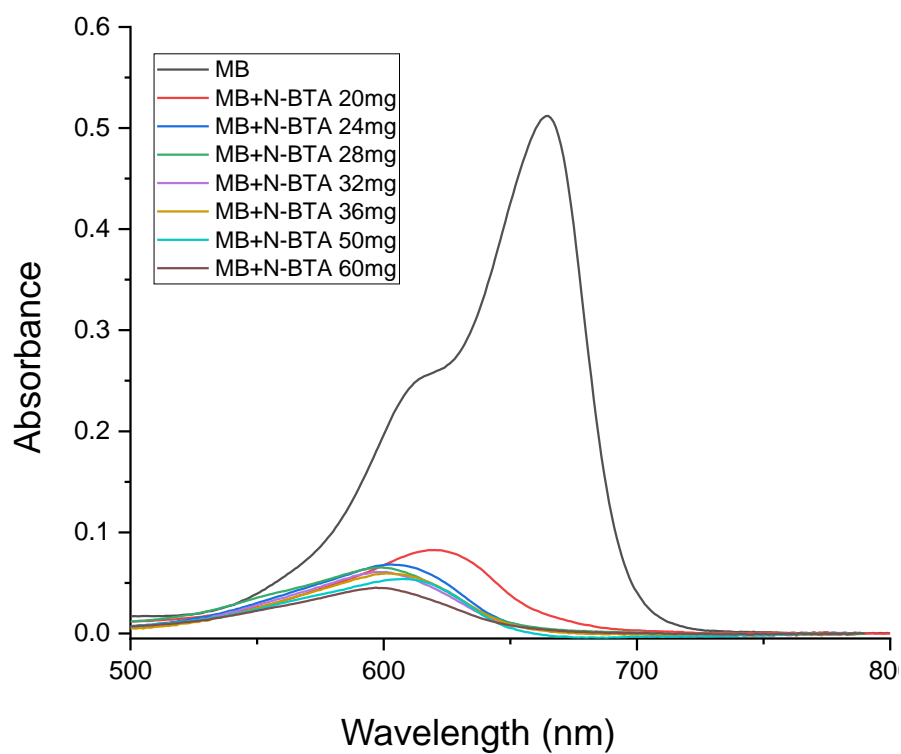

**Figure S14.** UV-vis experiments of MB ( $7.5 \times 10^{-6}$  M) with different concentrations of N-BTA after 5 days.

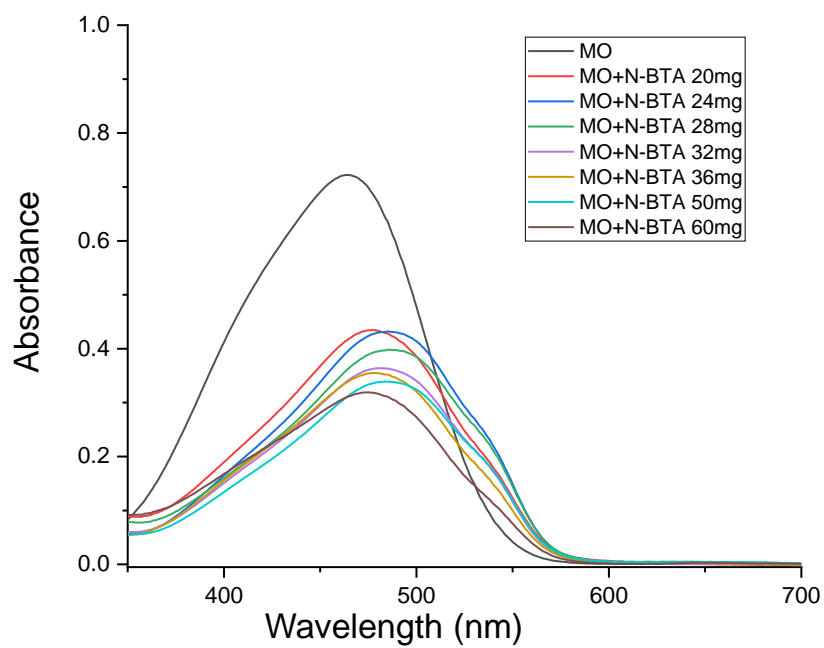

**Figure S15.** UV-vis experiments of MO ( $5.0 \times 10^{-5}$  M) with different concentrations of N-BTA after 2 days.

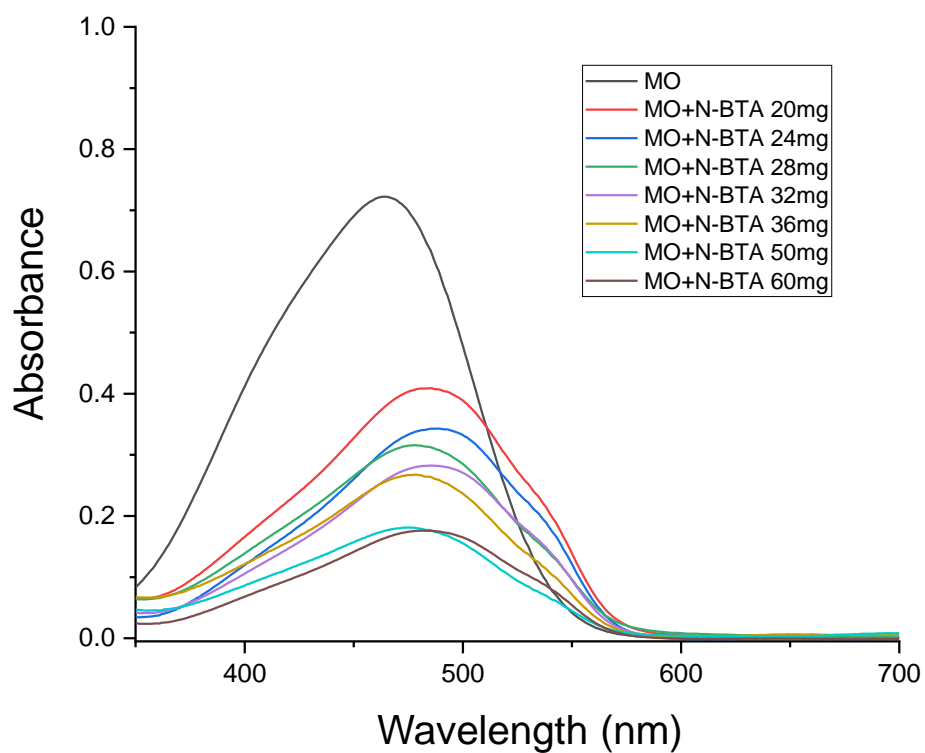

**Figure S16.** UV-vis experiments of MO (5.0 x 10<sup>-5</sup> M) with different concentrations of N-BTA after 5 days.

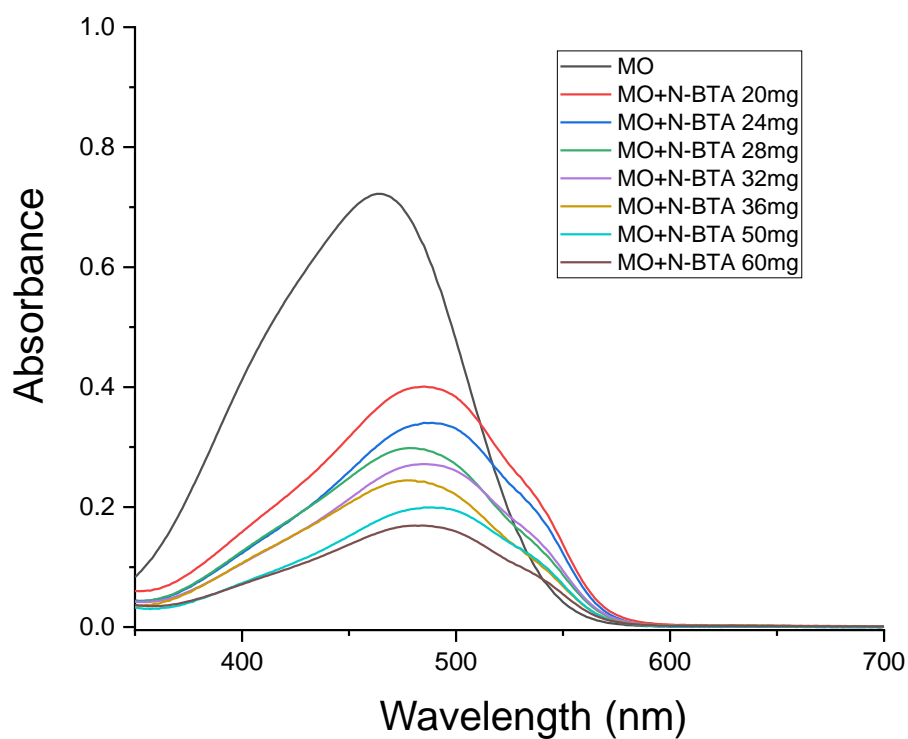

**Figure S17.** UV-vis experiments of MO (5.0 x 10<sup>-5</sup> M) with different concentrations of N-BTA after 7 days.

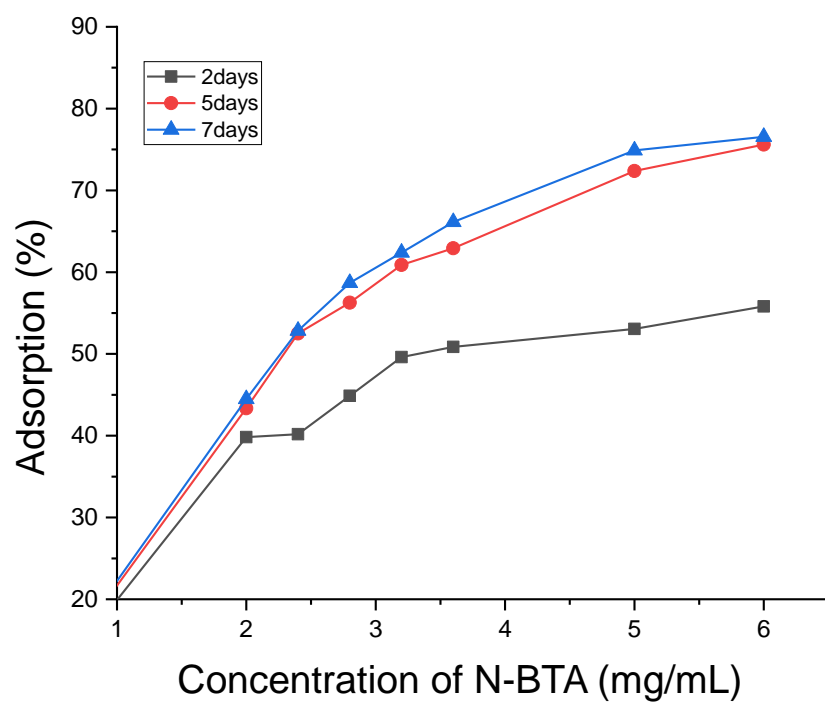

**Figure S18.** Adsorption ratio of MO with varying concentrations of N-BTA after 2, 5 and 7 days.

## 7. NMR spectra

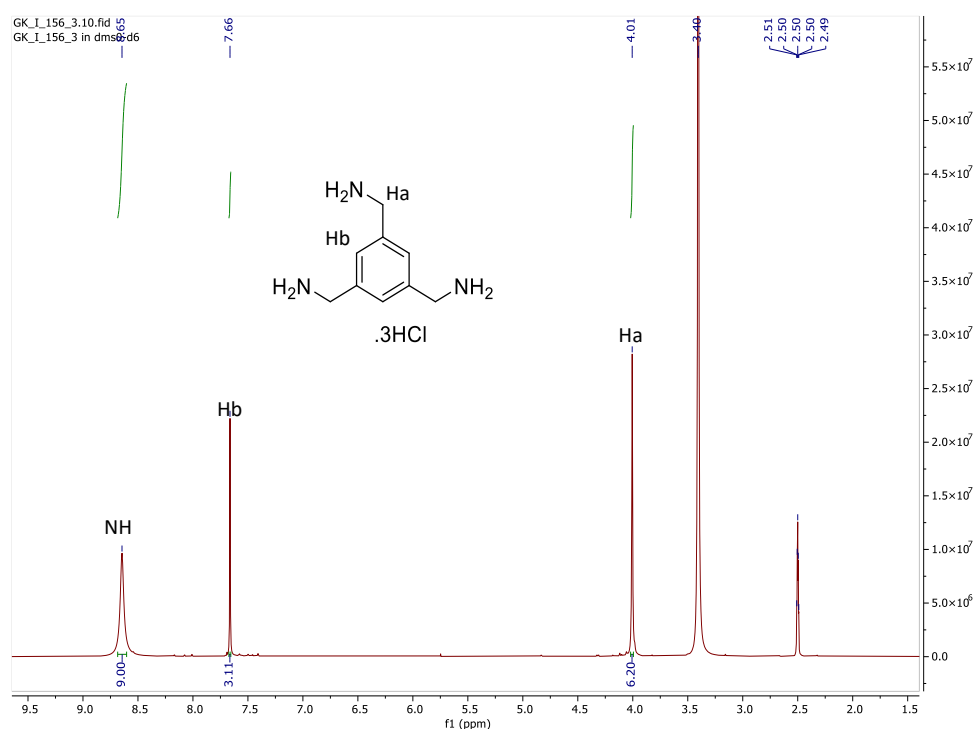

**Figure S19.** <sup>1</sup>H NMR spectrum of benzene-1,3,5-triyltrimethanamine.

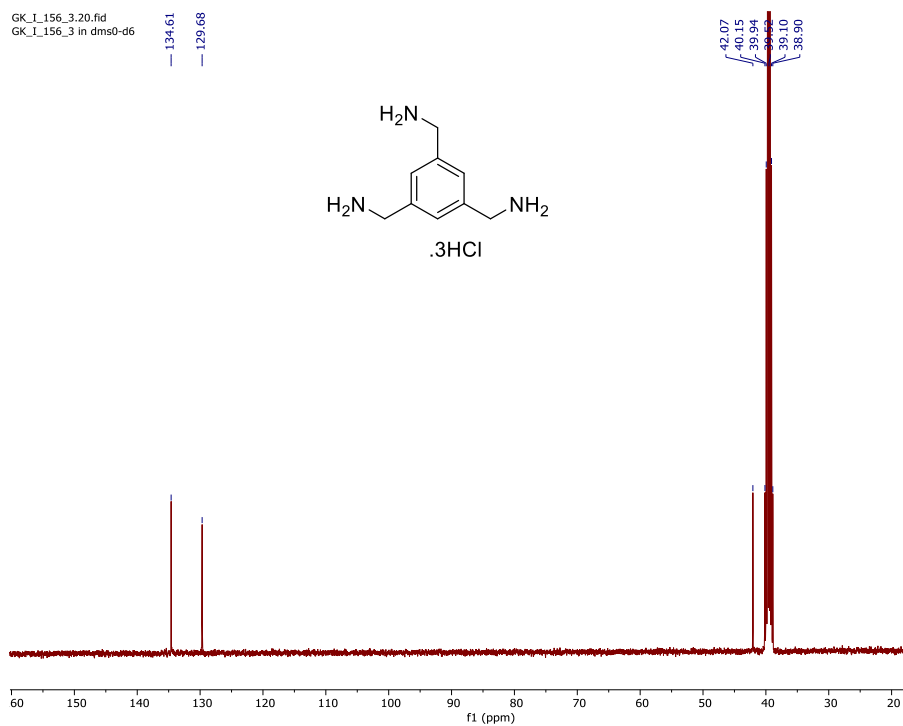

**Figure S20.**  $^{13}\text{C}$  NMR spectrum of benzene-1,3,5-triyltrimethanamine.

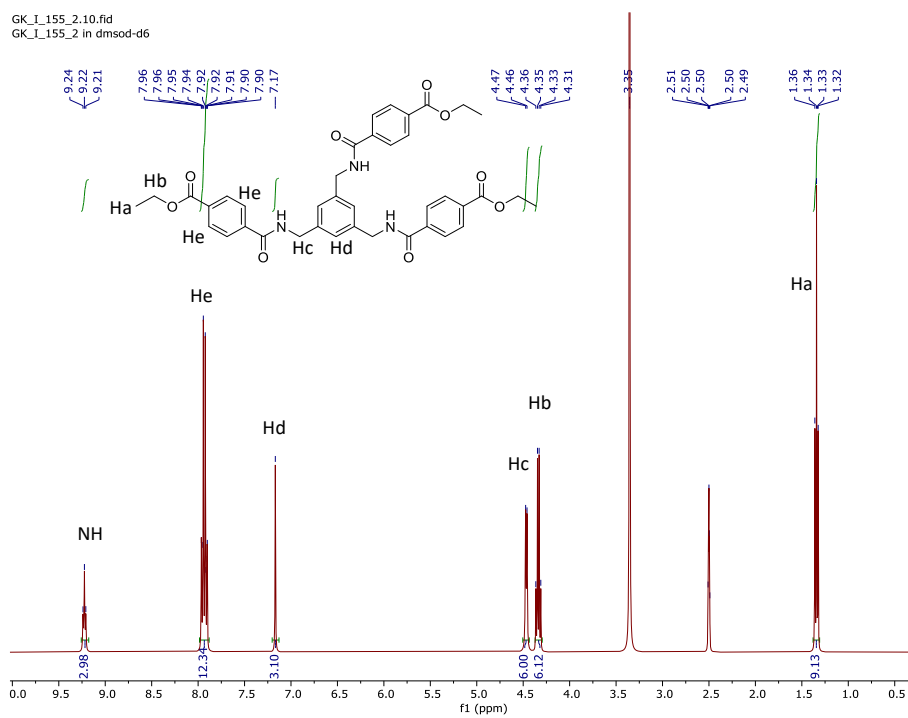

**Figure S21.**  $^1\text{H}$  NMR spectrum of N-BTA.

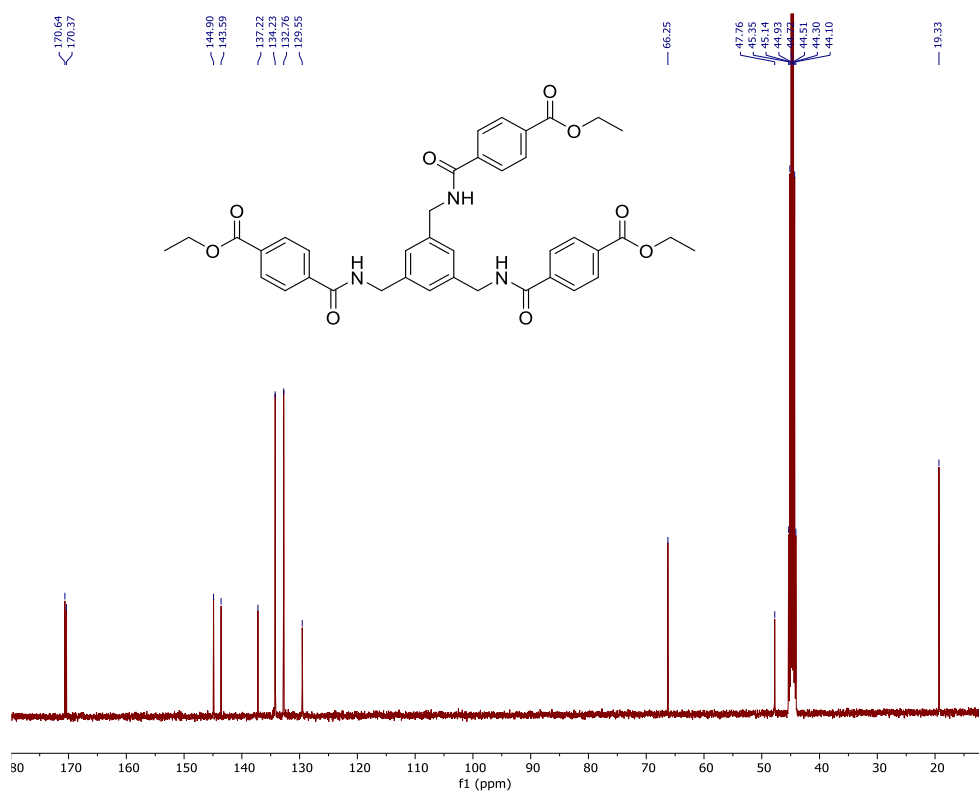

Figure S22.  $^{13}\text{C}$  NMR spectrum of N-BTA.
